# Supplementary material
Source: PubMed Central journal article supplement (PMC8179724)
Supplement: NIHMS1707829-supplement-1707829_Supp_info.pdf [file NIHMS1707829-supplement-1707829_Supp_info.pdf]

Supplementary Information

**Oral pharmacokinetics in beagle dogs of the mitragynine metabolite, 7-hydroxymitragynine**

Elizabeth A. Maxwell<sup>1</sup>, Tamara I. King<sup>2</sup>, Shyam H. Kamble<sup>2,3</sup>, Kanumuri Siva Rama Raju<sup>2,3</sup>, Erin C. Berthold<sup>2</sup>, Francisco León<sup>4</sup>, Aidan Hampson<sup>5</sup>, Lance R. McMahon<sup>6</sup>, Christopher R. McCurdy<sup>2,3,4\*</sup>, and Abhisheak Sharma<sup>2,3\*</sup>

**Affiliation**

<sup>1</sup>Department of Small Animal Clinical Sciences, College of Veterinary Medicine, University of Florida, Gainesville, FL, USA

<sup>2</sup>Department of Pharmaceutics, College of Pharmacy, University of Florida, Gainesville, FL, USA

<sup>3</sup>Translational Drug Development Core, Clinical and Translational Science Institute, University of Florida, Gainesville, FL, USA

<sup>4</sup>Department of Medicinal Chemistry, College of Pharmacy, University of Florida, Gainesville, FL, USA

<sup>5</sup>Division of Therapeutics and Medical Consequences, National Institute on Drug Abuse, National Institutes of Health, Bethesda, MD, USA

<sup>6</sup>Department of Pharmacodynamics, College of Pharmacy, University of Florida, Gainesville, FL, USA

Supplementary Table 1. Bench-top stability of 7-hydroxymitragynine in pooled dog plasma with or without protease inhibitor cocktail (N = 5 at each concentration).

| Stability Condition                            | Concentration<br>(ng/ml) | Variation (%Deviation) |                                                                 |
|------------------------------------------------|--------------------------|------------------------|-----------------------------------------------------------------|
|                                                |                          | Pooled dog plasma      | Pooled dog plasma<br>spiked with protease<br>cocktail inhibitor |
| Bench top stability (room<br>temperature, 1 h) | 3                        | -11.8                  | -7.8                                                            |
|                                                | 180                      | -11.0                  | -7.4                                                            |
